# Supplementary material for: Impact of a community pharmacist-led medication review on medicines use in patients on polypharmacy - a prospective randomised controlled trial
Source: PubMed Central journal article supplement (PMC4842295; doi:10.1186/s12913-016-1384-8), 2016-04-23
Supplement: 12913_2016_1384_MOESM1_ESM.pdf [file 12913_2016_1384_MOESM1_ESM.pdf]

|                                                                                                                                    |                                    |                                                                       |
|------------------------------------------------------------------------------------------------------------------------------------|------------------------------------|-----------------------------------------------------------------------|
| Pat.-ID: _____                                                                                                                     | Date of birth: ____ / ____ / _____ | Gender: <input type="checkbox"/> male <input type="checkbox"/> female |
| The patient currently takes four or more prescribed drugs a day during a period for at least three months <input type="checkbox"/> |                                    |                                                                       |

**1. Check** Start time: \_\_\_\_ . \_\_\_\_ h

| #  | Current prescribed drugs<br>[this check is based on patient's information and or sources of the pharmacy's database] | Assessing the need for counseling concerning medicines use |                                                          |                                                                                                                        | "Do you sometimes forget to take this medicine?"         | Counseling through pharmacist needed?                    | Comments<br>[continue on the back if needed] |
|----|----------------------------------------------------------------------------------------------------------------------|------------------------------------------------------------|----------------------------------------------------------|------------------------------------------------------------------------------------------------------------------------|----------------------------------------------------------|----------------------------------------------------------|----------------------------------------------|
|    |                                                                                                                      | Know how to dose [interval]                                | Know why                                                 | Know how long                                                                                                          |                                                          |                                                          |                                              |
| 1  | Name, dosing, and galenic formulation <span style="float: right;">New? <input type="checkbox"/></span>               | ____ - ____ - ____                                         | Yes <input type="checkbox"/> No <input type="checkbox"/> | <input type="checkbox"/> On demand<br><input type="checkbox"/> Temporary use<br><input type="checkbox"/> Long-term use | Yes <input type="checkbox"/> No <input type="checkbox"/> | Yes <input type="checkbox"/> No <input type="checkbox"/> |                                              |
| 2  | Name, dosing, and galenic formulation <span style="float: right;">New? <input type="checkbox"/></span>               | ____ - ____ - ____                                         | Yes <input type="checkbox"/> No <input type="checkbox"/> | <input type="checkbox"/> On demand<br><input type="checkbox"/> Temporary use<br><input type="checkbox"/> Long-term use | Yes <input type="checkbox"/> No <input type="checkbox"/> | Yes <input type="checkbox"/> No <input type="checkbox"/> |                                              |
| 3  | Name, dosing, and galenic formulation <span style="float: right;">New? <input type="checkbox"/></span>               | ____ - ____ - ____                                         | Yes <input type="checkbox"/> No <input type="checkbox"/> | <input type="checkbox"/> On demand<br><input type="checkbox"/> Temporary use<br><input type="checkbox"/> Long-term use | Yes <input type="checkbox"/> No <input type="checkbox"/> | Yes <input type="checkbox"/> No <input type="checkbox"/> |                                              |
| 4  | Name, dosing, and galenic formulation <span style="float: right;">New? <input type="checkbox"/></span>               | ____ - ____ - ____                                         | Yes <input type="checkbox"/> No <input type="checkbox"/> | <input type="checkbox"/> On demand<br><input type="checkbox"/> Temporary use<br><input type="checkbox"/> Long-term use | Yes <input type="checkbox"/> No <input type="checkbox"/> | Yes <input type="checkbox"/> No <input type="checkbox"/> |                                              |
| 5  | Name, dosing, and galenic formulation <span style="float: right;">New? <input type="checkbox"/></span>               | ____ - ____ - ____                                         | Yes <input type="checkbox"/> No <input type="checkbox"/> | <input type="checkbox"/> On demand<br><input type="checkbox"/> Temporary use<br><input type="checkbox"/> Long-term use | Yes <input type="checkbox"/> No <input type="checkbox"/> | Yes <input type="checkbox"/> No <input type="checkbox"/> |                                              |
| 6  | Name, dosing, and galenic formulation <span style="float: right;">New? <input type="checkbox"/></span>               | ____ - ____ - ____                                         | Yes <input type="checkbox"/> No <input type="checkbox"/> | <input type="checkbox"/> On demand<br><input type="checkbox"/> Temporary use<br><input type="checkbox"/> Long-term use | Yes <input type="checkbox"/> No <input type="checkbox"/> | Yes <input type="checkbox"/> No <input type="checkbox"/> |                                              |
| 7  | Name, dosing, and galenic formulation <span style="float: right;">New? <input type="checkbox"/></span>               | ____ - ____ - ____                                         | Yes <input type="checkbox"/> No <input type="checkbox"/> | <input type="checkbox"/> On demand<br><input type="checkbox"/> Temporary use<br><input type="checkbox"/> Long-term use | Yes <input type="checkbox"/> No <input type="checkbox"/> | Yes <input type="checkbox"/> No <input type="checkbox"/> |                                              |
| 8  | Name, dosing, and galenic formulation <span style="float: right;">New? <input type="checkbox"/></span>               | ____ - ____ - ____                                         | Yes <input type="checkbox"/> No <input type="checkbox"/> | <input type="checkbox"/> On demand<br><input type="checkbox"/> Temporary use<br><input type="checkbox"/> Long-term use | Yes <input type="checkbox"/> No <input type="checkbox"/> | Yes <input type="checkbox"/> No <input type="checkbox"/> |                                              |
| 9  | Name, dosing, and galenic formulation <span style="float: right;">New? <input type="checkbox"/></span>               | ____ - ____ - ____                                         | Yes <input type="checkbox"/> No <input type="checkbox"/> | <input type="checkbox"/> On demand<br><input type="checkbox"/> Temporary use<br><input type="checkbox"/> Long-term use | Yes <input type="checkbox"/> No <input type="checkbox"/> | Yes <input type="checkbox"/> No <input type="checkbox"/> |                                              |
| 10 | Name, dosing, and galenic formulation <span style="float: right;">New? <input type="checkbox"/></span>               | ____ - ____ - ____                                         | Yes <input type="checkbox"/> No <input type="checkbox"/> | <input type="checkbox"/> On demand<br><input type="checkbox"/> Temporary use<br><input type="checkbox"/> Long-term use | Yes <input type="checkbox"/> No <input type="checkbox"/> | Yes <input type="checkbox"/> No <input type="checkbox"/> |                                              |

**Self-medication** Yes  No

|   |                                                                                                        |                    |                                                          |                                                                                                                        |                                                          |                                                          |  |
|---|--------------------------------------------------------------------------------------------------------|--------------------|----------------------------------------------------------|------------------------------------------------------------------------------------------------------------------------|----------------------------------------------------------|----------------------------------------------------------|--|
| A | Name, dosing, and galenic formulation <span style="float: right;">New? <input type="checkbox"/></span> | ____ - ____ - ____ | Yes <input type="checkbox"/> No <input type="checkbox"/> | <input type="checkbox"/> On demand<br><input type="checkbox"/> Temporary use<br><input type="checkbox"/> Long-term use | Yes <input type="checkbox"/> No <input type="checkbox"/> | Yes <input type="checkbox"/> No <input type="checkbox"/> |  |
| B | Name, dosing, and galenic formulation <span style="float: right;">New? <input type="checkbox"/></span> | ____ - ____ - ____ | Yes <input type="checkbox"/> No <input type="checkbox"/> | <input type="checkbox"/> On demand<br><input type="checkbox"/> Temporary use<br><input type="checkbox"/> Long-term use | Yes <input type="checkbox"/> No <input type="checkbox"/> | Yes <input type="checkbox"/> No <input type="checkbox"/> |  |
| C | Name, dosing, and galenic formulation <span style="float: right;">New? <input type="checkbox"/></span> | ____ - ____ - ____ | Yes <input type="checkbox"/> No <input type="checkbox"/> | <input type="checkbox"/> On demand<br><input type="checkbox"/> Temporary use<br><input type="checkbox"/> Long-term use | Yes <input type="checkbox"/> No <input type="checkbox"/> | Yes <input type="checkbox"/> No <input type="checkbox"/> |  |

**2. Counseling / Recommendations**

  
  
  
  
  
  
  
  
  
  

| 3. Medication management                                                                                                                                                                                                                                                                  | Patient agrees                                           | 4. Interdisciplinary collaboration                                                                                                                                                                                    | Patient agrees                                           |
|-------------------------------------------------------------------------------------------------------------------------------------------------------------------------------------------------------------------------------------------------------------------------------------------|----------------------------------------------------------|-----------------------------------------------------------------------------------------------------------------------------------------------------------------------------------------------------------------------|----------------------------------------------------------|
| <input type="checkbox"/> The patient qualifies for a weekly dosing aid (WDA).<br>He uses <input type="checkbox"/> already <input type="checkbox"/> newly (since PMC) a WDA. Its refill occurs <input type="checkbox"/> through the patient <input type="checkbox"/> through the pharmacy. | Yes <input type="checkbox"/> No <input type="checkbox"/> | <input type="checkbox"/> <b>Information</b> to _____ physician<br><input type="checkbox"/> <b>Consultation</b> with _____ physician<br><input type="checkbox"/> <b>Referral of the patient</b> to the _____ physician | Yes <input type="checkbox"/> No <input type="checkbox"/> |
| <input type="checkbox"/> Patient has no need / does not qualify for a WDA.                                                                                                                                                                                                                | Yes <input type="checkbox"/> No <input type="checkbox"/> | <input type="checkbox"/> <b>Other interventions after PMC</b><br>[.....]                                                                                                                                              | Yes <input type="checkbox"/> No <input type="checkbox"/> |

|                                              |                         |
|----------------------------------------------|-------------------------|
| Date: ____ / ____ / ____                     | End time: ____ . ____ h |
| Patient' signature: _____                    |                         |
| Stamp pharmacy / Signature pharmacist: _____ |                         |
