# Supplementary material for: Impact of a community pharmacist-led medication review on medicines use in patients on polypharmacy - a prospective randomised controlled trial
Source: BMC Health Serv Res. 2016 Apr 23;16:145. doi: 10.1186/s12913-016-1384-8 (PMC4842295; doi:10.1186/s12913-016-1384-8)
Supplement: Additional file 2: — Data Medication Possession Ratio (MPR). (XLSX 42 kb) [file 12913_2016_1384_MOESM2_ESM.xlsx]

## Sheet: Tabelle1
Pat ID	Gender	Study group	Study region	ATC	MPR
1002	Male	Intervention	D-CH	C10AB05	0.92857
1002	Male	Intervention	D-CH	A10BD08	0.93878
1002	Male	Intervention	D-CH	C09AA03	1
1002	Male	Intervention	D-CH	M04AA01	1
1002	Male	Intervention	D-CH	N06AA06	0
1003	Male	Intervention	D-CH	G04CA52	0.84184
1003	Male	Intervention	D-CH	H03AA01	0.93367
1005	Male	Intervention	D-CH	A12AX00	0
1005	Male	Intervention	D-CH	G04CA02	0.20918
1005	Male	Intervention	D-CH	C08DB01	0.7602
1005	Male	Intervention	D-CH	H03AA01	0.9898
1005	Male	Intervention	D-CH	B01AC06	1
1005	Male	Intervention	D-CH	C09BA03	1
1006	Female	Control	D-CH	A02BC02	1
1006	Female	Control	D-CH	C08CA01	1
1006	Female	Control	D-CH	C09BA03	1
1008	Male	Control	D-CH	N03AF01	0.81122
1008	Male	Control	D-CH	B01AC06	0.90306
1008	Male	Control	D-CH	N06AB05	0.90306
1008	Male	Control	D-CH	A10BA02	0.96429
1008	Male	Control	D-CH	C10AA05	1
1008	Male	Control	D-CH	N06AA06	1
1009	Female	Intervention	D-CH	C09AA03	0.94898
1009	Female	Intervention	D-CH	B01AC06	1
1009	Female	Intervention	D-CH	C10AA03	1
1013	Male	Control	D-CH	J01EE01	0.28571
1013	Male	Control	D-CH	J02AC04	0.7551
1013	Male	Control	D-CH	B01AC06	0.85714
1013	Male	Control	D-CH	M04AA01	0.92347
1013	Male	Control	D-CH	J05AB11	0.92857
1013	Male	Control	D-CH	C10AA07	0.97959
1013	Male	Control	D-CH	C08DB01	1
1013	Male	Control	D-CH	C09AA05	1
1013	Male	Control	D-CH	L04AA06	1
1013	Male	Control	D-CH	L04AD01	1
1018	Female	Control	D-CH	A10BA02	0.28571
1018	Female	Control	D-CH	C05CX99	0.61224
1018	Female	Control	D-CH	N06DX02	0.65816
1018	Female	Control	D-CH	C07AG02	0.98469
1018	Female	Control	D-CH	C09DA04	1
1020	Male	Intervention	D-CH	C08DA01	0.52041
1020	Male	Intervention	D-CH	A02BC02	0.88776
1020	Male	Intervention	D-CH	C10AA05	0.92347
1020	Male	Intervention	D-CH	C07AB02	0.97449
1020	Male	Intervention	D-CH	L04AA06	0.9898
1020	Male	Intervention	D-CH	B01AC06	1
1021	Male	Control	D-CH	L04AD01	0.48469
1021	Male	Control	D-CH	C08CA01	0.93367
1021	Male	Control	D-CH	C09BA03	0.93367
1021	Male	Control	D-CH	R01AD12	1
1021	Male	Control	D-CH	R03AC13	1
1021	Male	Control	D-CH	R03BA01	1
1026	Male	Intervention	D-CH	C01BD01	0.84184
1026	Male	Intervention	D-CH	C09BA03	1
1033	Male	Control	D-CH	A02BC02	0.5102
1033	Male	Control	D-CH	B01AC06	0.73469
1033	Male	Control	D-CH	C07AB07	0.92857
1033	Male	Control	D-CH	C10AA05	0.97959
1033	Male	Control	D-CH	N06AB10	1
1034	Male	Intervention	D-CH	C07AB02	0.79082
1034	Male	Intervention	D-CH	C09BA04	0.88265
1034	Male	Intervention	D-CH	A02BC01	1
1035	Male	Control	D-CH	N05AN01	0.97959
1035	Male	Control	D-CH	C10AA03	1
1036	Female	Intervention	D-CH	G03CA03	0.65306
1036	Female	Intervention	D-CH	C07BB07	0.9898
1037	Male	Intervention	D-CH	B01AC06	1
1037	Male	Intervention	D-CH	C10AA03	1
1037	Male	Intervention	D-CH	H03AA01	1
1038	Male	Control	D-CH	C09DA01	0.97959
1038	Male	Control	D-CH	C08CA01	1
1039	Female	Control	D-CH	A12AX00	0.53061
1039	Female	Control	D-CH	B01AC06	1
1040	Male	Intervention	D-CH	G04CA52	0.15816
1040	Male	Intervention	D-CH	C07AB07	0.84694
1040	Male	Intervention	D-CH	C10AA05	0.84694
1040	Male	Intervention	D-CH	C09BA04	0.97959
1040	Male	Intervention	D-CH	B01AC06	0.9898
1042	Male	Intervention	D-CH	L04AA27	0.42347
1042	Male	Intervention	D-CH	C07AB02	0.63265
1042	Male	Intervention	D-CH	C09AA04	0.93878
1049	Male	Intervention	D-CH	C10AA05	0.90816
1049	Male	Intervention	D-CH	B01AC06	0.92347
1049	Male	Intervention	D-CH	G04CA02	0.94898
1049	Male	Intervention	D-CH	A02BC02	1
1049	Male	Intervention	D-CH	C01BD01	1
1050	Female	Intervention	D-CH	C10AA05	0.83163
1050	Female	Intervention	D-CH	L04AX01	0.93878
1050	Female	Intervention	D-CH	C09CA06	0.96429
1050	Female	Intervention	D-CH	C07AB02	1
1050	Female	Intervention	D-CH	C08CA05	1
1050	Female	Intervention	D-CH	L04AD01	1
1051	Male	Control	D-CH	B01AC06	0.5
1051	Male	Control	D-CH	C10AB02	0.93878
1053	Female	Control	D-CH	B01AC06	0.94388
1053	Female	Control	D-CH	C03AA03	0.96429
1053	Female	Control	D-CH	C10AA03	0.96429
1053	Female	Control	D-CH	C09CA04	0.97449
1053	Female	Control	D-CH	C10AX09	1
1054	Female	Intervention	D-CH	C09DA04	0.94898
1054	Female	Intervention	D-CH	R03AK06	0.98469
1054	Female	Intervention	D-CH	A02BC02	1
1054	Female	Intervention	D-CH	H03AA01	1
1056	Male	Intervention	D-CH	G04BD09	0.95408
1056	Male	Intervention	D-CH	B01AC06	0.9898
1056	Male	Intervention	D-CH	C09BA04	1
1057	Male	Intervention	D-CH	R03BA08	0.79592
1057	Male	Intervention	D-CH	R03AC13	0.80102
1057	Male	Intervention	D-CH	J02AC02	0.97959
1057	Male	Intervention	D-CH	J01EE01	0.98469
1057	Male	Intervention	D-CH	R03DC03	1
1058	Female	Control	D-CH	A02BC02	0.92347
1058	Female	Control	D-CH	R03AK06	0.96429
1081	Male	Control	D-CH	C07AB02	1
1082	Female	Control	D-CH	A02BC01	1
1082	Female	Control	D-CH	N06AX05	1
1082	Female	Control	D-CH	N06AX16	1
1083	Female	Intervention	D-CH	A02BC02	0.89796
1083	Female	Intervention	D-CH	R06AX26	0.94898
1083	Female	Intervention	D-CH	C01EX	1
1083	Female	Intervention	D-CH	C09DB02	1
1085	Female	Intervention	D-CH	R06AX13	0.89796
1085	Female	Intervention	D-CH	N06AB06	1
1085	Female	Intervention	D-CH	N07CA01	1
1085	Female	Intervention	D-CH	R03AK07	1
1087	Male	Control	D-CH	B01AC06	0.93878
1087	Male	Control	D-CH	A10BD05	0.97959
1087	Male	Control	D-CH	C08CA02	0.97959
1087	Male	Control	D-CH	C07AB02	0.9898
1087	Male	Control	D-CH	C10AA01	0.9949
1087	Male	Control	D-CH	C09AA04	1
1088	Male	Intervention	D-CH	N03AX16	0.63265
1088	Male	Intervention	D-CH	B01AC04	0.86224
1088	Male	Intervention	D-CH	C01EX	0.87245
1088	Male	Intervention	D-CH	C10AA05	0.91837
1097	Male	Control	D-CH	A10BD02	0
1097	Male	Control	D-CH	C08CA02	0.86224
1097	Male	Control	D-CH	B01AC06	0.97959
1097	Male	Control	D-CH	A02BC05	1
1097	Male	Control	D-CH	C09BA03	1
1097	Male	Control	D-CH	C10AA05	1
1098	Male	Intervention	D-CH	B01AC06	0.78571
1098	Male	Intervention	D-CH	C09AA05	0.79592
1098	Male	Intervention	D-CH	C10AA05	1
1099	Male	Intervention	D-CH	C08DB01	1
1100	Female	Intervention	D-CH	A02BC05	0.81633
1100	Female	Intervention	D-CH	N03AX16	0.83673
1100	Female	Intervention	D-CH	A12AX00	1
1100	Female	Intervention	D-CH	N06AX11	1
1101	Male	Intervention	D-CH	C09CA06	0.92857
1101	Male	Intervention	D-CH	A02BC02	1
1101	Male	Intervention	D-CH	N06CA02	1
1102	Male	Control	D-CH	G04CA02	0.87755
1102	Male	Control	D-CH	C10AA05	0.91327
1102	Male	Control	D-CH	B01AC06	0.96429
1102	Male	Control	D-CH	A02BC02	1
1102	Male	Control	D-CH	C09AA04	1
1103	Male	Control	D-CH	C08CA02	0.69898
1103	Male	Control	D-CH	A10BB12	0.88776
1103	Male	Control	D-CH	C09DA03	0.90816
1103	Male	Control	D-CH	A10BA02	0.94388
1103	Male	Control	D-CH	B01AC06	0.96429
1103	Male	Control	D-CH	C07AB03	1
1103	Male	Control	D-CH	R03BA01	1
1104	Male	Control	D-CH	C07BB07	0.9949
1104	Male	Control	D-CH	M04AA01	0.9949
1104	Male	Control	D-CH	A10BG03	1
1104	Male	Control	D-CH	A10BH01	1
1104	Male	Control	D-CH	C09CA03	1
1129	Female	Control	D-CH	M03BX01	0.94388
1129	Female	Control	D-CH	C07AA07	1
1129	Female	Control	D-CH	N06AG02	1
1130	Male	Control	D-CH	A10BB12	0.7551
1130	Male	Control	D-CH	B01AC06	0.79592
1130	Male	Control	D-CH	C09DA03	0.92347
1130	Male	Control	D-CH	A10BA02	0.9898
1130	Male	Control	D-CH	C10AA05	0.9898
1130	Male	Control	D-CH	C07BB07	1
1131	Male	Intervention	D-CH	M04AA01	0.5102
1131	Male	Intervention	D-CH	C07AB03	0.81122
1131	Male	Intervention	D-CH	C10AA05	0.97449
1131	Male	Intervention	D-CH	C07AA05	1
1131	Male	Intervention	D-CH	N05CF02	1
1132	Male	Control	D-CH	C08CA02	1
1133	Female	Intervention	D-CH	N06AB10	0.94898
1133	Female	Intervention	D-CH	C09DA04	0.9898
1133	Female	Intervention	D-CH	A10BA02	1
1133	Female	Intervention	D-CH	C10AX09	1
1134	Male	Intervention	D-CH	B01AC06	0.98469
1134	Male	Intervention	D-CH	C07AB02	1
1134	Male	Intervention	D-CH	C09DX01	1
1134	Male	Intervention	D-CH	C10AA05	1
1134	Male	Intervention	D-CH	M04AA01	1
1135	Female	Control	D-CH	C08CA01	0.5102
1135	Female	Control	D-CH	H05BX01	0.89796
1136	Male	Intervention	D-CH	C07AB12	0.18367
1136	Male	Intervention	D-CH	A02BC05	0.66837
1136	Male	Intervention	D-CH	B01AC06	0.66837
1136	Male	Intervention	D-CH	C09BA03	0.67857
1136	Male	Intervention	D-CH	C10AA07	0.67857
1137	Male	Control	D-CH	C09DA01	0.76531
1137	Male	Control	D-CH	B01AC06	0.97449
1137	Male	Control	D-CH	C03CA04	0.9949
1137	Male	Control	D-CH	C07AB03	0.9949
1138	Male	Control	D-CH	B01AC06	1
1138	Male	Control	D-CH	C10AA03	1
1138	Male	Control	D-CH	G04CB01	1
1138	Male	Control	D-CH	R03DC03	1
1139	Male	Control	D-CH	C09DA06	0.94388
1139	Male	Control	D-CH	C03CA04	0.95408
1139	Male	Control	D-CH	B01AF01	1
1139	Male	Control	D-CH	C01DX16	1
1139	Male	Control	D-CH	C07FB02	1
1139	Male	Control	D-CH	N04BC05	1
1140	Male	Intervention	D-CH	B01AC06	0
1140	Male	Intervention	D-CH	R06AE07	0.60204
1140	Male	Intervention	D-CH	A02BC02	1
1140	Male	Intervention	D-CH	H03AA01	1
1141	Male	Control	D-CH	C03CA04	0.86735
1141	Male	Control	D-CH	B01AC06	0.89286
1141	Male	Control	D-CH	C09CA06	0.89286
1142	Male	Intervention	D-CH	C09CA01	0.97959
1142	Male	Intervention	D-CH	N06AB10	0.97959
1142	Male	Intervention	D-CH	C10AA05	0.9898
1142	Male	Intervention	D-CH	A02BC05	1
1143	Female	Intervention	D-CH	N03AX12	0.95918
1143	Female	Intervention	D-CH	B01AC06	0.96429
1143	Female	Intervention	D-CH	H03AA01	0.9949
1144	Female	Intervention	D-CH	H03AA01	0.93367
1144	Female	Intervention	D-CH	A02BC02	0.96939
1144	Female	Intervention	D-CH	G04BD08	1
1162	Male	Control	D-CH	C10AA05	0.86735
1177	Female	Control	D-CH	A12AX00	0.13776
1177	Female	Control	D-CH	C09AA02	1
1178	Male	Control	D-CH	C09AA03	0.91327
1178	Male	Control	D-CH	C08CA01	1
1178	Male	Control	D-CH	C10AA05	1
1178	Male	Control	D-CH	C10AX09	1
1179	Female	Intervention	D-CH	R03BA02	0.7398
1179	Female	Intervention	D-CH	B01AC06	1
1179	Female	Intervention	D-CH	C07AB12	1
1179	Female	Intervention	D-CH	C09CA04	1
1179	Female	Intervention	D-CH	C10AA07	1
1179	Female	Intervention	D-CH	G02CX04	1
1180	Female	Control	D-CH	G03CA04	0.2551
1180	Female	Control	D-CH	A12AX00	0.42347
1181	Male	Control	D-CH	G04CA02	0.78571
1181	Male	Control	D-CH	C10AA01	0.96429
1181	Male	Control	D-CH	C09BA02	1
1183	Female	Intervention	D-CH	C09BA04	0.92347
1184	Female	Intervention	D-CH	B01AC04	0.61735
1184	Female	Intervention	D-CH	N07CA01	0.89796
1184	Female	Intervention	D-CH	C09CA04	0.90816
1184	Female	Intervention	D-CH	N06AB10	0.92857
1184	Female	Intervention	D-CH	N06DX02	0.93878
1185	Female	Intervention	D-CH	A02BC01	0.97959
1186	Female	Intervention	D-CH	A10BB09	0.92347
1186	Female	Intervention	D-CH	C10AA07	0.97959
1186	Female	Intervention	D-CH	C09AA03	1
1187	Male	Control	D-CH	C07CB03	1
1187	Male	Control	D-CH	C09AA02	1
1188	Female	Control	D-CH	H02AB09	0.63776
1188	Female	Control	D-CH	H03AA01	0.82143
1188	Female	Control	D-CH	G03FB05	0.82653
1188	Female	Control	D-CH	N03AX14	0.86224
1188	Female	Control	D-CH	N03AF01	0.88265
1189	Female	Control	D-CH	C10AA01	0.94898
1189	Female	Control	D-CH	A02BC02	0.95918
1189	Female	Control	D-CH	N06AB04	1
1190	Male	Intervention	D-CH	B01AC06	1
1193	Female	Intervention	D-CH	C09DA01	0.77041
1193	Female	Intervention	D-CH	R06AE07	1
1194	Male	Intervention	D-CH	B01AC06	0.95408
1194	Male	Intervention	D-CH	C10AA05	0.98469
1194	Male	Intervention	D-CH	L04AA06	1
1194	Male	Intervention	D-CH	L04AD02	1
1195	Female	Intervention	D-CH	C09BA03	0.90816
1195	Female	Intervention	D-CH	C10AA03	0.90816
1195	Female	Intervention	D-CH	B01AC06	1
1196	Female	Intervention	D-CH	N04BD02	1
1198	Female	Control	D-CH	N05CX99	0.97449
1198	Female	Control	D-CH	B01AF01	1
1198	Female	Control	D-CH	C01AA05	1
1198	Female	Control	D-CH	C03DA01	1
1198	Female	Control	D-CH	C07AB02	1
1200	Female	Control	D-CH	C09DA08	0.82653
1200	Female	Control	D-CH	C10AA07	0.94898
1200	Female	Control	D-CH	A12AX00	0.97449
1200	Female	Control	D-CH	G03FA01	1
1201	Male	Control	D-CH	B03BB01	0.64796
1201	Male	Control	D-CH	C03EA01	1
1210	Male	Intervention	D-CH	A02BC02	1
1210	Male	Intervention	D-CH	B01AC06	1
1210	Male	Intervention	D-CH	C07AB12	1
1210	Male	Intervention	D-CH	C08CA01	1
1210	Male	Intervention	D-CH	C10AA07	1
1211	Male	Control	D-CH	C07AB03	0.68878
1211	Male	Control	D-CH	A11DA01	0.92347
1211	Male	Control	D-CH	B01AC06	0.97449
1211	Male	Control	D-CH	B03BB01	1
1211	Male	Control	D-CH	C09DA04	1
1211	Male	Control	D-CH	C10AA03	1
1215	Male	Control	D-CH	A02BC02	1
1215	Male	Control	D-CH	B01AC04	1
1215	Male	Control	D-CH	C09AA04	1
1217	Male	Control	D-CH	B01AC06	0.89286
1217	Male	Control	D-CH	C09BA02	0.94388
1217	Male	Control	D-CH	A10BA02	1
1217	Male	Control	D-CH	C10AA05	1
1224	Female	Control	D-CH	A12AX00	0.63776
1224	Female	Control	D-CH	B01AC06	0.7602
1224	Female	Control	D-CH	C09DA06	0.83163
1225	Male	Intervention	D-CH	C10AA05	0.97959
1225	Male	Intervention	D-CH	N06AB10	1
1227	Male	Intervention	D-CH	A10BX07	0.10714
1227	Male	Intervention	D-CH	A10BD08	0.86224
1227	Male	Intervention	D-CH	C09DA06	0.86735
1228	Female	Control	D-CH	N07CA02	0.4898
1230	Female	Intervention	D-CH	A02BC01	0.90306
1230	Female	Intervention	D-CH	C09AA05	1
1232	Male	Control	D-CH	B01AC04	0.89286
1232	Male	Control	D-CH	A02BC02	1
1232	Male	Control	D-CH	A10BA02	1
1232	Male	Control	D-CH	B01AC06	1
1232	Male	Control	D-CH	C08CA13	1
1232	Male	Control	D-CH	C09CA06	1
1234	Male	Control	D-CH	C09BA04	0.91837
1234	Male	Control	D-CH	C08CA01	0.9949
1234	Male	Control	D-CH	A02BC05	1
1234	Male	Control	D-CH	C10AA05	1
1235	Male	Control	D-CH	C10AA07	0.9949
1235	Male	Control	D-CH	B01AC06	1
1235	Male	Control	D-CH	C01BD07	1
1237	Male	Intervention	D-CH	G04CA02	0.82143
1237	Male	Intervention	D-CH	N06AA06	0.86224
1237	Male	Intervention	D-CH	A02BC02	1
1237	Male	Intervention	D-CH	B01AC06	1
1237	Male	Intervention	D-CH	C07CB03	1
1238	Female	Control	D-CH	C10AA01	0.84694
1238	Female	Control	D-CH	C07AB07	0.91327
1238	Female	Control	D-CH	B01AC06	1
1243	Female	Intervention	D-CH	C09BA07	0.92347
1243	Female	Intervention	D-CH	C10AA03	0.95408
1243	Female	Intervention	D-CH	A02BC02	0.95918
1243	Female	Intervention	D-CH	B01AC06	1
1244	Male	Control	D-CH	A10BA02	1
1244	Male	Control	D-CH	A10BD08	1
1245	Male	Intervention	D-CH	B01AC06	0.72959
1245	Male	Intervention	D-CH	C08CA01	0.94898
1245	Male	Intervention	D-CH	C10AA07	1
1258	Male	Intervention	D-CH	A12AX00	0.81633
1258	Male	Intervention	D-CH	A11EA	0.97449
1258	Male	Intervention	D-CH	A02BC01	1
1258	Male	Intervention	D-CH	C05CA54	1
1258	Male	Intervention	D-CH	C09AA03	1
1260	Male	Control	D-CH	C09BA04	0.80102
1260	Male	Control	D-CH	C07AB02	0.85204
1261	Female	Control	D-CH	G03CA03	0.28061
1261	Female	Control	D-CH	G04BD11	0.61735
1261	Female	Control	D-CH	C03CA04	0.78061
1261	Female	Control	D-CH	G02CX04	0.83673
1261	Female	Control	D-CH	A02BC02	1
1261	Female	Control	D-CH	N06AX05	1
1261	Female	Control	D-CH	N06AX21	1
1263	Female	Intervention	D-CH	A02BC02	0.79082
1263	Female	Intervention	D-CH	B01AC06	0.95918
1263	Female	Intervention	D-CH	C03CA04	0.97959
1263	Female	Intervention	D-CH	C07AB02	1
1264	Male	Control	D-CH	B01AC06	0.7398
1264	Male	Control	D-CH	C10AA03	0.76531
1264	Male	Control	D-CH	C09BB04	0.97959
1264	Male	Control	D-CH	A10BD07	0.9949
1264	Male	Control	D-CH	C07AB12	1
1273	Male	Control	D-CH	G04CA02	0.91327
1273	Male	Control	D-CH	C10AA03	0.96429
1273	Male	Control	D-CH	N05AH04	0.96939
1273	Male	Control	D-CH	B01AC06	1
1273	Male	Control	D-CH	C09AA04	1
1275	Male	Control	D-CH	B01AC06	0.88265
1275	Male	Control	D-CH	C10AX09	0.90306
1275	Male	Control	D-CH	C07AB02	0.97449
1275	Male	Control	D-CH	C09CA01	0.9949
1275	Male	Control	D-CH	C10AA07	1
1276	Male	Intervention	D-CH	C07AG02	0.2551
1276	Male	Intervention	D-CH	C08CA13	0.53571
1276	Male	Intervention	D-CH	A12AA12	0.58673
1276	Male	Intervention	D-CH	B01AC06	0.59184
1277	Female	Control	D-CH	C10AA03	0.19388
1277	Female	Control	D-CH	A02BC02	1
1278	Female	Intervention	D-CH	A12AX00	0.80102
1278	Female	Intervention	D-CH	A02BC03	0.97449
1278	Female	Intervention	D-CH	R06AE09	0.98469
1278	Female	Intervention	D-CH	R03AK07	0.9898
1278	Female	Intervention	D-CH	R03DC03	1
1279	Male	Intervention	D-CH	C07AB02	0.72449
1279	Male	Intervention	D-CH	C10AA07	0.72449
1279	Male	Intervention	D-CH	N06AX21	0.94388
1279	Male	Intervention	D-CH	A02BC02	1
1279	Male	Intervention	D-CH	B01AC06	1
1279	Male	Intervention	D-CH	C09DA01	1
1279	Male	Intervention	D-CH	N06AX05	1
1289	Male	Control	D-CH	C09AA03	0.66327
1289	Male	Control	D-CH	B01AC06	0.96939
1290	Female	Intervention	D-CH	N05AD01	0.93367
1290	Female	Intervention	D-CH	N06AX16	0.95918
1290	Female	Intervention	D-CH	N03AX16	0.96429
1292	Male	Control	D-CH	C09CA06	1
1293	Male	Control	D-CH	C09AA02	0.77551
1293	Male	Control	D-CH	L04AD01	1
1293	Male	Control	D-CH	L04AX01	1
1293	Male	Control	D-CH	N03AX12	1
1293	Male	Control	D-CH	N03AX14	1
1293	Male	Control	D-CH	N06AA12	1
1293	Male	Control	D-CH	N06BA07	1
1294	Male	Control	D-CH	C10AA01	0.40816
1294	Male	Control	D-CH	C09CA06	0.89796
1294	Male	Control	D-CH	A02BC01	0.90306
1321	Female	Control	D-CH	C10AA05	0.9949
1321	Female	Control	D-CH	A02BC01	1
1321	Female	Control	D-CH	C09AA04	1
1322	Male	Control	D-CH	L04AA06	0.84184
1322	Male	Control	D-CH	C10AA05	0.85714
1322	Male	Control	D-CH	L04AD01	0.92857
1322	Male	Control	D-CH	M04AA01	0.96429
1322	Male	Control	D-CH	A02BC02	1
1322	Male	Control	D-CH	C09BA02	1
1323	Female	Intervention	D-CH	A12AX00	1
1323	Female	Intervention	D-CH	C07AB02	1
1323	Female	Intervention	D-CH	C09DX01	1
1323	Female	Intervention	D-CH	M04AA01	1
1332	Female	Control	D-CH	C09DA03	0.5
1332	Female	Control	D-CH	B01AC06	0.72959
1332	Female	Control	D-CH	A12AX00	0.86735
1332	Female	Control	D-CH	C10AA07	0.89796
1332	Female	Control	D-CH	A02BC01	0.9898
1332	Female	Control	D-CH	C03CA04	1
1337	Male	Control	D-CH	B01AC06	0.94898
1337	Male	Control	D-CH	C07AB02	0.96939
1337	Male	Control	D-CH	C08CA01	0.96939
1338	Male	Intervention	D-CH	C08CA13	0.94898
1338	Male	Intervention	D-CH	A10BD07	1
1338	Male	Intervention	D-CH	B01AC06	1
1338	Male	Intervention	D-CH	C07AB02	1
1338	Male	Intervention	D-CH	C09DA06	1
1339	Male	Control	D-CH	B01AC06	1
1339	Male	Control	D-CH	C09BA09	1
1339	Male	Control	D-CH	C10AA05	1
1339	Male	Control	D-CH	N07CA01	1
1340	Female	Intervention	D-CH	C10AA01	0.91837
1341	Male	Intervention	D-CH	C09BA03	0.87245
1341	Male	Intervention	D-CH	B01AC06	0.98469
1341	Male	Intervention	D-CH	C07AB02	1
1341	Male	Intervention	D-CH	C08CA02	1
1342	Female	Intervention	D-CH	A12AX00	0.94898
1342	Female	Intervention	D-CH	C07AB07	0.97959
1342	Female	Intervention	D-CH	A02BC05	1
1343	Female	Control	D-CH	A12AX00	0.76531
1343	Female	Control	D-CH	A02BC01	0.96429
1344	Male	Control	D-CH	C10AA05	0.9949
1344	Male	Control	D-CH	B01AC06	1
1355	Female	Intervention	D-CH	G03FA01	0.89286
1355	Female	Intervention	D-CH	B01AC06	1
1355	Female	Intervention	D-CH	C07AB02	1
1355	Female	Intervention	D-CH	C09BA05	1
1357	Male	Intervention	D-CH	C05CA54	0.94388
1357	Male	Intervention	D-CH	G04CA52	0.9949
1357	Male	Intervention	D-CH	A02BC05	1
1357	Male	Intervention	D-CH	B01AC06	1
1357	Male	Intervention	D-CH	C10AA05	1
2049	Female	Intervention	D-CH	C10AA01	0.95408
2049	Female	Intervention	D-CH	C09CA01	0.95918
2049	Female	Intervention	D-CH	C01AA05	1
2050	Female	Intervention	D-CH	A12AX00	0.96939
2051	Male	Control	D-CH	B01AC06	0
2051	Male	Control	D-CH	A02BC02	0.61224
2051	Male	Control	D-CH	C09CA06	0.62245
2051	Male	Control	D-CH	C07AB07	0.64286
2051	Male	Control	D-CH	C10AA07	0.64286
2053	Female	Control	D-CH	A12AX00	0.13265
2053	Female	Control	D-CH	A02BC01	0.5
2055	Female	Control	D-CH	C09BA02	0.77551
2055	Female	Control	D-CH	C07AB07	1
2056	Male	Intervention	D-CH	C09AA03	0.66327
2056	Male	Intervention	D-CH	A10BA02	1
2056	Male	Intervention	D-CH	B01AC06	1
2056	Male	Intervention	D-CH	C05CX99	1
2056	Male	Intervention	D-CH	C08CA01	1
2057	Male	Intervention	D-CH	C09BA03	0.98469
2057	Male	Intervention	D-CH	C07AB07	0.9898
2057	Male	Intervention	D-CH	B01AC06	1
2059	Female	Control	D-CH	A02BC03	0.63265
2059	Female	Control	D-CH	A10BA02	1
2060	Female	Control	D-CH	B01AC06	1
2060	Female	Control	D-CH	C07AB07	1
2060	Female	Control	D-CH	C09CA04	1
2060	Female	Control	D-CH	C10AA03	1
2063	Female	Control	D-CH	V03AC03	0.61735
2063	Female	Control	D-CH	V03AC02	0.95918
2063	Female	Control	D-CH	B01AC06	0.97449
2063	Female	Control	D-CH	M04AA01	0.97959
3001	Female	Control	D-CH	B03AD03	0.2449
3001	Female	Control	D-CH	G03FA01	0.67347
3001	Female	Control	D-CH	C09BB04	1
3005	Male	Intervention	D-CH	A10BA02	0.61224
3005	Male	Intervention	D-CH	N03AX16	0.84184
3005	Male	Intervention	D-CH	N06AB10	0.88776
3005	Male	Intervention	D-CH	M04AA01	0.92347
3005	Male	Intervention	D-CH	A02BC01	1
3005	Male	Intervention	D-CH	C03AA03	1
3005	Male	Intervention	D-CH	C07AB02	1
3005	Male	Intervention	D-CH	G04CX02	1
3018	Female	Intervention	D-CH	N06DX02	0.29592
3018	Female	Intervention	D-CH	M03BX04	0.67347
3018	Female	Intervention	D-CH	C03CA04	0.77551
3018	Female	Intervention	D-CH	B01AC06	0.95408
3018	Female	Intervention	D-CH	A02BC02	1
3020	Female	Control	D-CH	C10AA01	0.62755
3020	Female	Control	D-CH	G04BD08	0.76531
3020	Female	Control	D-CH	N06AB10	0.89796
3020	Female	Control	D-CH	B01AC04	1
3020	Female	Control	D-CH	C05CX99	1
3034	Male	Control	D-CH	C10AB05	0
3034	Male	Control	D-CH	C10BA02	0.93878
3034	Male	Control	D-CH	A07DA03	0.96429
3034	Male	Control	D-CH	C03CA04	0.97959
3034	Male	Control	D-CH	B01AC06	1
3034	Male	Control	D-CH	C09CA06	1
3034	Male	Control	D-CH	M04AA01	1
3034	Male	Control	D-CH	N03AX12	1
3034	Male	Control	D-CH	N06AX11	1
3035	Male	Control	D-CH	C09DB01	1
3035	Male	Control	D-CH	C10AA01	1
3036	Female	Intervention	D-CH	C03CA04	0.9898
3036	Female	Intervention	D-CH	B01AC06	1
3036	Female	Intervention	D-CH	B01AC22	1
3036	Female	Intervention	D-CH	C09XA02	1
3038	Male	Control	D-CH	C10AA05	0.66837
3039	Female	Intervention	D-CH	L04AA06	0.89286
3039	Female	Intervention	D-CH	A12AX00	0.91837
3039	Female	Intervention	D-CH	C10AA04	0.94898
3050	Male	Control	D-CH	N06AX03	0.79082
3084	Male	Control	D-CH	C03CA04	0.31633
3084	Male	Control	D-CH	B01AC06	0.39286
3084	Male	Control	D-CH	G04CA02	0.40306
3084	Male	Control	D-CH	C10AA05	0.69388
3084	Male	Control	D-CH	C07AB12	1
3095	Male	Intervention	D-CH	C09CA04	0.72959
3095	Male	Intervention	D-CH	A02BC05	1
3100	Female	Control	D-CH	C07AB02	0.75
3100	Female	Control	D-CH	B01AC06	0.92857
3100	Female	Control	D-CH	N07CA01	0.93878
3100	Female	Control	D-CH	C08CA13	0.97449
3100	Female	Control	D-CH	N06AB04	0.97449
3100	Female	Control	D-CH	C09AA03	1
3103	Female	Control	D-CH	C01EX	0.62755
3103	Female	Control	D-CH	A10BA02	0.9898
3103	Female	Control	D-CH	C03EA01	1
3103	Female	Control	D-CH	C07AB03	1
3116	Female	Control	D-CH	A02BC02	1
3116	Female	Control	D-CH	N03AX16	1
3116	Female	Control	D-CH	N04BA02	1
3118	Female	Control	D-CH	C03EA01	1
3118	Female	Control	D-CH	C09AA03	1
3125	Male	Intervention	D-CH	B01AC06	0.80612
3125	Male	Intervention	D-CH	H03AA01	0.83673
3125	Male	Intervention	D-CH	C09BA03	0.96429
3130	Male	Intervention	D-CH	A02BC02	0.69898
3130	Male	Intervention	D-CH	C09CA03	0.83163
3130	Male	Intervention	D-CH	B01AC06	0.96939
3131	Male	Intervention	D-CH	C10AA03	0.5102
3131	Male	Intervention	D-CH	B01AC04	0.83163
3131	Male	Intervention	D-CH	C09AA05	0.90816
3131	Male	Intervention	D-CH	A02BC05	0.95918
3131	Male	Intervention	D-CH	C07AB02	1
3131	Male	Intervention	D-CH	G04CA02	1
3132	Male	Control	D-CH	C07AB07	0.52041
3132	Male	Control	D-CH	B01AC06	0.92347
3132	Male	Control	D-CH	C09CA04	0.92347
3132	Male	Control	D-CH	A12AX00	0.9949
3133	Female	Control	D-CH	B01AC06	0.86735
3133	Female	Control	D-CH	C10AA03	0.9898
3133	Female	Control	D-CH	C05CX99	1
3133	Female	Control	D-CH	C08CA05	1
3134	Female	Intervention	D-CH	N06DX02	0.60714
3134	Female	Intervention	D-CH	B01AC06	1
3134	Female	Intervention	D-CH	H03AA01	1
3135	Female	Intervention	D-CH	A02BC05	1
3135	Female	Intervention	D-CH	H03AA01	1
3135	Female	Intervention	D-CH	M03BX02	1
3135	Female	Intervention	D-CH	N05CF02	1
3135	Female	Intervention	D-CH	N06AA06	1
3137	Female	Intervention	D-CH	C09BA08	0
3137	Female	Intervention	D-CH	R03AC12	0.91837
3137	Female	Intervention	D-CH	N06AX03	0.95408
3137	Female	Intervention	D-CH	R05CB01	0.98469
3137	Female	Intervention	D-CH	A03AX04	1
3137	Female	Intervention	D-CH	B01AC06	1
3137	Female	Intervention	D-CH	C08CA13	1
3137	Female	Intervention	D-CH	C10AA07	1
3138	Female	Control	D-CH	A02BC02	0.87245
3138	Female	Control	D-CH	B01AC06	1
3138	Female	Control	D-CH	C10AA05	1
3138	Female	Control	D-CH	H03AA01	1
3139	Female	Intervention	D-CH	A12AX00	0.7602
3139	Female	Intervention	D-CH	A02BC05	0.90306
3140	Female	Intervention	D-CH	C07AB02	0.94388
3141	Male	Control	D-CH	A12AX00	0.87245
3141	Male	Control	D-CH	A02BC05	1
3142	Female	Control	D-CH	B01AC06	1
3142	Female	Control	D-CH	C07AB07	1
3142	Female	Control	D-CH	C09AA02	1
3142	Female	Control	D-CH	C10AA01	1
3142	Female	Control	D-CH	N06CA02	1
3143	Male	Intervention	D-CH	C09CA03	0.89286
3143	Male	Intervention	D-CH	A02BC02	1
3143	Male	Intervention	D-CH	B01AC06	1
3143	Male	Intervention	D-CH	C07AB07	1
3143	Male	Intervention	D-CH	G04CA02	1
3143	Male	Intervention	D-CH	R03AK06	1
3144	Female	Control	D-CH	A02BC02	0.9898
3145	Male	Control	D-CH	N05CF02	0.7449
3145	Male	Control	D-CH	R03BB04	0.90306
3145	Male	Control	D-CH	A10BA02	0.92347
3145	Male	Control	D-CH	A02BC01	0.96429
3145	Male	Control	D-CH	C10AA05	0.97449
3145	Male	Control	D-CH	C09DA03	0.97959
3145	Male	Control	D-CH	C08CA01	0.98469
3145	Male	Control	D-CH	A10BB04	1
3145	Male	Control	D-CH	B01AF01	1
3145	Male	Control	D-CH	C03CA01	1
3147	Female	Control	D-CH	A12AA04	0
3147	Female	Control	D-CH	C10AA07	0.79082
3147	Female	Control	D-CH	G03XC01	0.93367
3151	Male	Intervention	D-CH	R01AD05	1
3171	Male	Intervention	D-CH	R03AC18	0.69388
3171	Male	Intervention	D-CH	R03AK07	0.70918
3181	Male	Intervention	D-CH	C09AA03	0.92857
3181	Male	Intervention	D-CH	B01AC06	0.9898
3181	Male	Intervention	D-CH	A10BD08	1
3181	Male	Intervention	D-CH	A10BG03	1
3181	Male	Intervention	D-CH	C10AA05	1
3193	Female	Control	D-CH	C03CA04	0.82653
3193	Female	Control	D-CH	C07AB03	1
3194	Female	Control	D-CH	N03AG01	0.96429
3194	Female	Control	D-CH	C10AA05	0.9898
3194	Female	Control	D-CH	A12AX00	1
3194	Female	Control	D-CH	B01AC06	1
3195	Female	Intervention	D-CH	A02BC02	0.90306
3196	Female	Intervention	D-CH	A12AX00	0.40306
3196	Female	Intervention	D-CH	C01DA08	1
3196	Female	Intervention	D-CH	H03AA01	1
3196	Female	Intervention	D-CH	N06CA02	1
3197	Female	Control	D-CH	C01BD01	0.82653
3197	Female	Control	D-CH	C07AB07	1
3197	Female	Control	D-CH	C09DA01	1
3198	Female	Intervention	D-CH	G03DA02	0.28571
3198	Female	Intervention	D-CH	H03AA01	0.9949
3198	Female	Intervention	D-CH	G03CA03	1
3199	Male	Intervention	D-CH	C10AA05	0.45408
3199	Male	Intervention	D-CH	A02BC02	0.7398
3199	Male	Intervention	D-CH	C07AG02	0.90306
3199	Male	Intervention	D-CH	B01AC04	0.94388
3199	Male	Intervention	D-CH	C03CA04	0.9898
3199	Male	Intervention	D-CH	C09DB01	0.9898
3200	Female	Control	D-CH	C09DA06	1
3201	Female	Intervention	D-CH	C07AB07	0.58673
3201	Female	Intervention	D-CH	B01AC06	0.82143
3201	Female	Intervention	D-CH	C05CA01	0.92857
3201	Female	Intervention	D-CH	C08CA05	0.92857
3201	Female	Intervention	D-CH	N07CA02	0.92857
3201	Female	Intervention	D-CH	C09DA07	1
3201	Female	Intervention	D-CH	H03AA01	1
3202	Male	Control	D-CH	C03CA04	0.94898
3202	Male	Control	D-CH	A10BA02	1
3202	Male	Control	D-CH	B01AC06	1
3202	Male	Control	D-CH	C07AB07	1
3202	Male	Control	D-CH	C09DA06	1
3202	Male	Control	D-CH	M04AA01	1
3210	Female	Intervention	D-CH	A02BC02	0.57143
3210	Female	Intervention	D-CH	C08CA01	1
3210	Female	Intervention	D-CH	C09BA04	1
3213	Male	Intervention	D-CH	R03DA04	0.86735
3214	Female	Intervention	D-CH	B03BB01	0.52551
3214	Female	Intervention	D-CH	A11DA01	0.68878
3214	Female	Intervention	D-CH	N03AX16	0.86224
3214	Female	Intervention	D-CH	A02BC01	1
3214	Female	Intervention	D-CH	A11EA	1
3214	Female	Intervention	D-CH	C03DA01	1
3218	Female	Control	D-CH	A11EA	0.7449
3218	Female	Control	D-CH	C10AA03	1
3220	Female	Intervention	D-CH	L04AA06	0.82143
3220	Female	Intervention	D-CH	N06BA04	0.85204
3221	Male	Intervention	D-CH	C08CA01	0.77551
3221	Male	Intervention	D-CH	R03DC03	0.93878
3221	Male	Intervention	D-CH	R03AK07	1
3226	Female	Control	D-CH	A12AX00	0.11224
3226	Female	Control	D-CH	C09DA06	0.39796
3226	Female	Control	D-CH	H02AB09	0.7602
3226	Female	Control	D-CH	A02BC02	0.82143
3227	Female	Intervention	D-CH	A12AX00	0.29592
3227	Female	Intervention	D-CH	L01XX05	1
3228	Male	Control	D-CH	C09DA04	0.04082
3228	Male	Control	D-CH	G04CA02	0.47449
3228	Male	Control	D-CH	A10BB09	0.62245
3228	Male	Control	D-CH	C10AA07	0.7551
3228	Male	Control	D-CH	C03CA04	1
3229	Female	Intervention	D-CH	H03AA01	1
3230	Female	Intervention	D-CH	B01AC06	0.89796
3231	Female	Control	D-CH	A02BC02	0.52551
3231	Female	Control	D-CH	G03CA03	0.85714
3231	Female	Control	D-CH	B01AC06	0.95918
3232	Female	Intervention	D-CH	A12AX00	0.06122
3232	Female	Intervention	D-CH	C10AX09	0.15816
3233	Male	Control	D-CH	C10AA05	0.9898
3233	Male	Control	D-CH	B01AC06	1
3233	Male	Control	D-CH	C07AB02	1
3233	Male	Control	D-CH	C09DA06	1
3234	Female	Intervention	D-CH	C01BD01	0.94898
3234	Female	Intervention	D-CH	A02BC05	1
3235	Male	Intervention	D-CH	C10BA02	0.76531
3235	Male	Intervention	D-CH	B01AC06	0.86224
3235	Male	Intervention	D-CH	C05CX99	1
3235	Male	Intervention	D-CH	C09DA03	1
3235	Male	Intervention	D-CH	N06DX02	1
3236	Female	Control	D-CH	C05CA54	0.60204
3236	Female	Control	D-CH	N06DX02	0.91837
3236	Female	Control	D-CH	C07AB02	0.9949
3236	Female	Control	D-CH	C03DA01	1
3236	Female	Control	D-CH	C10AA05	1
3236	Female	Control	D-CH	H03AA01	1
5002	Male	Intervention	F-CH	C09DA06	0.64286
5002	Male	Intervention	F-CH	B01AC06	0.71429
5002	Male	Intervention	F-CH	C07AB02	0.73469
5002	Male	Intervention	F-CH	A10BA02	0.86224
5003	Female	Intervention	F-CH	A12AX00	0.53061
5003	Female	Intervention	F-CH	C09DA06	0.94898
5003	Female	Intervention	F-CH	A11CC04	0.96939
5003	Female	Intervention	F-CH	C07AB03	0.96939
5003	Female	Intervention	F-CH	H03AA01	0.9898
5005	Male	Control	F-CH	A10BA02	0.61735
5005	Male	Control	F-CH	A10BB09	1
5005	Male	Control	F-CH	B01AC06	1
5005	Male	Control	F-CH	C07AB02	1
5006	Female	Intervention	F-CH	M03BX04	0.66327
5006	Female	Intervention	F-CH	A12AX00	0.85204
5007	Female	Intervention	F-CH	C09CA08	0.60714
5007	Female	Intervention	F-CH	A10BA02	0.93878
5007	Female	Intervention	F-CH	C07BB07	0.94898
5007	Female	Intervention	F-CH	A12AX00	1
5007	Female	Intervention	F-CH	C10AA01	1
5018	Male	Intervention	F-CH	A02BC05	0.89286
5018	Male	Intervention	F-CH	B01AC06	0.89286
5018	Male	Intervention	F-CH	C09AA10	0.89286
5018	Male	Intervention	F-CH	C07AB03	0.94388
5019	Female	Control	F-CH	A10BA02	0.38265
5019	Female	Control	F-CH	A12AX00	0.98469
5019	Female	Control	F-CH	C07AA05	1
5019	Female	Control	F-CH	N06AX05	1
5020	Male	Intervention	F-CH	C09AA03	0.91837
5020	Male	Intervention	F-CH	B01AC06	0.96939
5020	Male	Intervention	F-CH	C10AA05	0.9949
5020	Male	Intervention	F-CH	C07AB07	1
5021	Male	Control	F-CH	C07AB02	0.97449
5021	Male	Control	F-CH	C09AA03	0.97449
5021	Male	Control	F-CH	B01AC06	1
5022	Female	Intervention	F-CH	C10AA01	0.80612
5022	Female	Intervention	F-CH	N06AB05	1
5023	Female	Intervention	F-CH	B03AA07	0.71429
5023	Female	Intervention	F-CH	A10BB09	0.88265
5023	Female	Intervention	F-CH	B01AC06	0.95918
5023	Female	Intervention	F-CH	C09AA02	0.96429
5023	Female	Intervention	F-CH	A10BA02	0.97449
5023	Female	Intervention	F-CH	H03AA01	0.97449
5023	Female	Intervention	F-CH	N05CD05	0.9898
5023	Female	Intervention	F-CH	C08CA01	1
5024	Female	Control	F-CH	C08CA13	0.75
5024	Female	Control	F-CH	C09CA08	0.95918
5024	Female	Control	F-CH	C07AB07	1
5025	Male	Intervention	F-CH	G04CA02	0.85204
5025	Male	Intervention	F-CH	C07AA05	0.85714
5025	Male	Intervention	F-CH	B01AC06	0.95918
5025	Male	Intervention	F-CH	C10AA05	1
5026	Female	Intervention	F-CH	C09DA06	0.85714
5026	Female	Intervention	F-CH	B01AC06	1
5027	Female	Control	F-CH	G03CA03	0.28571
5027	Female	Control	F-CH	C07AB02	0.79082
5027	Female	Control	F-CH	A12AX00	0.96939
5027	Female	Control	F-CH	C07FB02	1
5029	Male	Intervention	F-CH	C10AA03	0.52041
5029	Male	Intervention	F-CH	C09AA04	0.54082
5029	Male	Intervention	F-CH	B01AC04	0.90816
5030	Female	Control	F-CH	G04BD11	0.97449
5030	Female	Control	F-CH	A10BA02	1
6001	Female	Intervention	F-CH	N06AB03	0.60204
6003	Female	Intervention	F-CH	C10BA02	0.78061
6004	Female	Control	F-CH	H02AB07	0.35714
6004	Female	Control	F-CH	A12AX00	0.7602
6006	Female	Intervention	F-CH	N06AB03	0.36224
6006	Female	Intervention	F-CH	A02BC02	0.85204
6008	Male	Control	F-CH	N06AX16	0.82143
6010	Male	Control	F-CH	C01BD01	0.65306
6010	Male	Control	F-CH	C05CX99	0.68878
6010	Male	Control	F-CH	A12AX00	0.94898
6010	Male	Control	F-CH	B01AC06	0.96429
6012	Female	Intervention	F-CH	A02BC01	0.64796
6012	Female	Intervention	F-CH	N04BC04	0.85204
6013	Female	Intervention	F-CH	A12AX00	0.58163
6013	Female	Intervention	F-CH	C03CA04	0.73469
6013	Female	Intervention	F-CH	L02BG03	0.88265
6014	Male	Control	F-CH	B01AC06	0
6014	Male	Control	F-CH	C07AG02	0.67347
6014	Male	Control	F-CH	C09AA02	1
6033	Female	Intervention	F-CH	A02BC05	1
6033	Female	Intervention	F-CH	M03BX02	1
6033	Female	Intervention	F-CH	N06AX21	1
6035	Male	Intervention	F-CH	C09AA04	0.96429
6036	Male	Intervention	F-CH	A02BC01	0.45408
6037	Male	Control	F-CH	C07AB02	0.71429
6037	Male	Control	F-CH	B01AC04	0.93367
6037	Male	Control	F-CH	B01AC06	0.95408
6037	Male	Control	F-CH	C09AA02	1
6037	Male	Control	F-CH	C10AA07	1
6038	Female	Control	F-CH	B01AC06	0.11224
6038	Female	Control	F-CH	B01AC04	0.42857
6038	Female	Control	F-CH	C07AB02	0.64286
6038	Female	Control	F-CH	H03AA01	0.64286
6039	Male	Control	F-CH	C10AA03	0.76531
6039	Male	Control	F-CH	C01BC04	0.89286
6039	Male	Control	F-CH	G04CA02	0.9898
6040	Male	Control	F-CH	A10BD07	0.92857
6040	Male	Control	F-CH	C03DA01	1
6040	Male	Control	F-CH	C08DB01	1
6040	Male	Control	F-CH	C09CA07	1
6040	Male	Control	F-CH	G04CA02	1
6043	Male	Control	F-CH	H03BB01	0.76531
6043	Male	Control	F-CH	C10AA05	0.90306
6043	Male	Control	F-CH	A12AX00	0.94898
6043	Male	Control	F-CH	C07CB03	0.96939
6044	Female	Intervention	F-CH	N06DX02	0.60714
6044	Female	Intervention	F-CH	C09CA07	0.96939
6044	Female	Intervention	F-CH	C07AB03	1
6044	Female	Intervention	F-CH	C10AA05	1
6045	Male	Control	F-CH	A02BC05	1
6045	Male	Control	F-CH	A10BA02	1
6045	Male	Control	F-CH	C09DA06	1
6045	Male	Control	F-CH	C10AA01	1
6046	Female	Intervention	F-CH	A12AX00	0.82143
6046	Female	Intervention	F-CH	C10AA03	1
6047	Female	Control	F-CH	B01AC06	0.70408
6047	Female	Control	F-CH	C09CA01	0.70408
6047	Female	Control	F-CH	H03AA01	1
6048	Male	Intervention	F-CH	B01AC06	0.55612
6048	Male	Intervention	F-CH	C01BC04	0.98469
6055	Female	Control	F-CH	B01AC06	0.96429
6055	Female	Control	F-CH	C08DB01	1
6055	Female	Control	F-CH	C10AA07	1
6066	Female	Control	F-CH	A12AX00	0.38265
6066	Female	Control	F-CH	A07EC01	0.79082
6067	Female	Control	F-CH	A03AA04	0.89286
6068	Female	Intervention	F-CH	C07AB02	0.63265
6068	Female	Intervention	F-CH	C09DA03	0.63265
6069	Female	Control	F-CH	B01AC04	0.35204
6069	Female	Control	F-CH	C07AB02	0.71429
6069	Female	Control	F-CH	A02BC02	0.81633
6069	Female	Control	F-CH	C09CA07	0.93878
6069	Female	Control	F-CH	C10AA04	0.93878
6069	Female	Control	F-CH	B01AC06	1
6071	Female	Intervention	F-CH	C07AB07	0.9949
6072	Male	Intervention	F-CH	C09AA03	1
6073	Female	Control	F-CH	B01AC04	0.95408
6074	Female	Control	F-CH	G02CX04	1
6075	Female	Intervention	F-CH	N06AA09	1
6076	Female	Control	F-CH	A12AX00	0.87245
6078	Male	Intervention	F-CH	C01EB17	0.94388
6078	Male	Intervention	F-CH	B01AC06	0.9949
6079	Female	Control	F-CH	C09CA03	1
6080	Female	Intervention	F-CH	A12AX00	0.39796
6080	Female	Intervention	F-CH	G03XC01	0.88265
6080	Female	Intervention	F-CH	N04BC05	1
6114	Male	Control	F-CH	B01AC06	0.70918
6114	Male	Control	F-CH	M04AA01	0.88776
6116	Male	Control	F-CH	B01AC06	0.68367
6116	Male	Control	F-CH	C09AA04	0.7449
6116	Male	Control	F-CH	A10BB12	0.82143
6116	Male	Control	F-CH	A10BD07	0.84694
6116	Male	Control	F-CH	C10AA07	0.93367
6119	Female	Control	F-CH	A02BC02	0.91837
7017	Male	Control	F-CH	B01AC06	0.94898
7017	Male	Control	F-CH	C09BA02	1
7018	Female	Control	F-CH	A12AX00	0.30612
7018	Female	Control	F-CH	N06AB10	0.80612
7018	Female	Control	F-CH	C09CA06	0.96429
7019	Male	Intervention	F-CH	C10BA02	0.58163
7019	Male	Intervention	F-CH	C07AB02	0.90306
7019	Male	Intervention	F-CH	B01AC06	0.94388
7019	Male	Intervention	F-CH	A10BA02	1
7020	Male	Control	F-CH	A02BC02	0.55102
7020	Male	Control	F-CH	G04CA52	0.88776
7020	Male	Control	F-CH	C01BC04	0.97959
7021	Female	Intervention	F-CH	C03CA04	0.35714
7021	Female	Intervention	F-CH	C10AA05	0.77041
7021	Female	Intervention	F-CH	C09AA03	0.95918
7022	Female	Intervention	F-CH	C09CA07	0.85714
7022	Female	Intervention	F-CH	G02CX99	0.90306
7023	Female	Control	F-CH	A02BC02	1
7023	Female	Control	F-CH	A12AX00	1
7023	Female	Control	F-CH	H03AA01	1
7023	Female	Control	F-CH	N03AX16	1
7023	Female	Control	F-CH	N06AB03	1
7024	Male	Intervention	F-CH	N05CM02	0.60204
7024	Male	Intervention	F-CH	N06AB03	0.84184
7024	Male	Intervention	F-CH	N04BA02	0.98469
7024	Male	Intervention	F-CH	M04AA01	1
7025	Female	Control	F-CH	C05CA53	0.80612
7025	Female	Control	F-CH	B01AC06	0.88776
7025	Female	Control	F-CH	A10BA02	0.94898
7025	Female	Control	F-CH	C09DA04	0.97959
7025	Female	Control	F-CH	C07AB07	1
7025	Female	Control	F-CH	N06AA05	1
7036	Female	Control	F-CH	A11HA05	0.91327
7037	Male	Control	F-CH	A02BC01	0.4949
7037	Male	Control	F-CH	R03AK07	0.83673
7037	Male	Control	F-CH	B01AC06	0.84694
7037	Male	Control	F-CH	C10AA03	1
8001	Female	Control	F-CH	A12AX00	0
8001	Female	Control	F-CH	L04AX01	1
8001	Female	Control	F-CH	N04BC05	1
8003	Female	Intervention	F-CH	C08DB01	0.87755
8003	Female	Intervention	F-CH	C07AB07	1
8019	Male	Intervention	F-CH	N06AB10	0.35204
8019	Male	Intervention	F-CH	C10AA07	0.5102
8019	Male	Intervention	F-CH	A11CC04	1
8020	Male	Intervention	F-CH	C08CA01	0.91327
8020	Male	Intervention	F-CH	C09DA04	0.91327
8020	Male	Intervention	F-CH	B01AC06	1
8021	Female	Intervention	F-CH	C09DA06	0.98469
8033	Female	Control	F-CH	N03AX11	0.42347
8033	Female	Control	F-CH	A12AX00	0.46429
8033	Female	Control	F-CH	C10AB02	0.48469
8033	Female	Control	F-CH	C07AA05	0.62755
8034	Female	Intervention	F-CH	C07AB02	0.96939
8034	Female	Intervention	F-CH	A12AX00	1
8035	Male	Control	F-CH	N07CA01	0.91837
8035	Male	Control	F-CH	C10AA07	0.96939
8035	Male	Control	F-CH	M04AA01	1
8036	Female	Intervention	F-CH	A12AX00	0.33673
8036	Female	Intervention	F-CH	H03AA01	0.96429
8036	Female	Intervention	F-CH	A02BC02	0.9898
8036	Female	Intervention	F-CH	C07AB02	1
8036	Female	Intervention	F-CH	C10AA01	1
8036	Female	Intervention	F-CH	H02AB09	1
8036	Female	Intervention	F-CH	N05CF02	1
8037	Female	Intervention	F-CH	N07CA01	0.85714
8037	Female	Intervention	F-CH	C07AB02	1
8037	Female	Intervention	F-CH	C09DA06	1
8038	Female	Control	F-CH	N06AB05	0.65816
8038	Female	Control	F-CH	C08CA01	0.93367
8038	Female	Control	F-CH	A10BD07	1
8038	Female	Control	F-CH	C09DA04	1
8041	Female	Control	F-CH	R03AK06	0.82653
8041	Female	Control	F-CH	R03DC03	0.86735
8041	Female	Control	F-CH	R03DA04	0.87245
8041	Female	Control	F-CH	R03BB04	0.94898
8041	Female	Control	F-CH	C10AA05	0.96939
8041	Female	Control	F-CH	C09DA04	1
8041	Female	Control	F-CH	N06AB10	1
8054	Male	Intervention	F-CH	B01AC06	0.84694
8054	Male	Intervention	F-CH	C09DB01	0.93878
8054	Male	Intervention	F-CH	M04AA01	0.96429
8055	Female	Control	F-CH	C07AB03	0.60204
9001	Female	Control	F-CH	C08CA05	0.28571
9001	Female	Control	F-CH	C10AA05	0.77551
9001	Female	Control	F-CH	H03AA01	1
9002	Female	Intervention	F-CH	C08CA01	0.68367
9002	Female	Intervention	F-CH	C10AA03	0.68367
9002	Female	Intervention	F-CH	A10BA02	0.77551
9002	Female	Intervention	F-CH	C07AB02	0.93367
9002	Female	Intervention	F-CH	A10BH03	1
9002	Female	Intervention	F-CH	C09DA04	1
9003	Female	Intervention	F-CH	A02BC02	1
9003	Female	Intervention	F-CH	B01AC04	1
9003	Female	Intervention	F-CH	N05CD05	1
9004	Female	Intervention	F-CH	A10BD07	0.93367
9004	Female	Intervention	F-CH	B01AC06	0.93367
9004	Female	Intervention	F-CH	A02BC02	1
9004	Female	Intervention	F-CH	C09CA04	1
9004	Female	Intervention	F-CH	N06AA02	1
9005	Male	Intervention	F-CH	A10BD07	0.93367
9005	Male	Intervention	F-CH	B01AC06	0.93367
9017	Female	Intervention	F-CH	C07AB02	0.68367
9017	Female	Intervention	F-CH	A12AX00	1
9017	Female	Intervention	F-CH	B01AC06	1
9017	Female	Intervention	F-CH	C03CA04	1
9018	Female	Control	F-CH	A10BH03	0.96939
9018	Female	Control	F-CH	C07AB03	0.9898
9018	Female	Control	F-CH	A10BB09	1
9019	Female	Intervention	F-CH	C02AC05	0.36224
9019	Female	Intervention	F-CH	N03AB02	0.7551
9019	Female	Intervention	F-CH	C07AB02	1
9020	Female	Intervention	F-CH	C09AA04	0.96939
9020	Female	Intervention	F-CH	H03AA01	1
9021	Male	Control	F-CH	G04CA52	0.9949
9021	Male	Control	F-CH	C01AA05	1
9021	Male	Control	F-CH	C07AB02	1
9021	Male	Control	F-CH	C09DX01	1
9022	Male	Intervention	F-CH	C09AA05	0.54082
9022	Male	Intervention	F-CH	C07AB02	0.71429
9022	Male	Intervention	F-CH	C10AA03	0.81122
9022	Male	Intervention	F-CH	A10BA02	0.89286
9024	Male	Control	F-CH	C10AA05	0.5102
9024	Male	Control	F-CH	B01AC06	0.94898
9024	Male	Control	F-CH	C07AB02	1
9024	Male	Control	F-CH	C09DB02	1
9025	Male	Control	F-CH	A10BA02	0.79592
9025	Male	Control	F-CH	C07AB02	0.89796
9025	Male	Control	F-CH	C09DA04	0.90306
9025	Male	Control	F-CH	C10AB05	0.91837
9025	Male	Control	F-CH	G04CA52	0.97449
9025	Male	Control	F-CH	C08CA01	1
9025	Male	Control	F-CH	N06AB04	1
