# Supplementary material for: Impact of a community pharmacist-led medication review on medicines use in patients on polypharmacy - a prospective randomised controlled trial
Source: BMC Health Serv Res. 2016 Apr 23;16:145. doi: 10.1186/s12913-016-1384-8 (PMC4842295; doi:10.1186/s12913-016-1384-8)
Supplement: Additional file 3: — Data Daily Polypharmacy Possession Ratio (DPPR). (XLSX 18 kb) [file 12913_2016_1384_MOESM3_ESM.xlsx]

## Sheet: Tabelle1
Pat ID	Gender	Study group	Study region	nDrugs	DPPR
1002	Male	Intervention	D-CH	5	0.77
1003	Male	Intervention	D-CH	2	0.89
1005	Male	Intervention	D-CH	6	0.66
1006	Female	Control	D-CH	3	1
1008	Male	Control	D-CH	6	0.93
1009	Female	Intervention	D-CH	3	0.98
1013	Male	Control	D-CH	10	0.87
1018	Female	Control	D-CH	5	0.71
1020	Male	Intervention	D-CH	6	0.88
1021	Male	Control	D-CH	6	0.89
1026	Male	Intervention	D-CH	2	0.92
1033	Male	Control	D-CH	5	0.83
1034	Male	Intervention	D-CH	3	0.89
1035	Male	Control	D-CH	2	0.99
1036	Female	Intervention	D-CH	2	0.82
1037	Male	Intervention	D-CH	3	1
1038	Male	Control	D-CH	2	0.99
1039	Female	Control	D-CH	2	0.77
1040	Male	Intervention	D-CH	5	0.76
1042	Male	Intervention	D-CH	3	0.66
1049	Male	Intervention	D-CH	5	0.96
1050	Female	Intervention	D-CH	6	0.96
1051	Male	Control	D-CH	2	0.72
1053	Female	Control	D-CH	5	0.97
1054	Female	Intervention	D-CH	4	0.98
1056	Male	Intervention	D-CH	3	0.98
1057	Male	Intervention	D-CH	5	0.91
1058	Female	Control	D-CH	2	0.94
1081	Male	Control	D-CH	1	1
1082	Female	Control	D-CH	3	1
1083	Female	Intervention	D-CH	4	0.96
1085	Female	Intervention	D-CH	4	0.97
1087	Male	Control	D-CH	6	0.98
1088	Male	Intervention	D-CH	4	0.82
1097	Male	Control	D-CH	6	0.81
1098	Male	Intervention	D-CH	3	0.86
1099	Male	Intervention	D-CH	1	1
1100	Female	Intervention	D-CH	4	0.91
1101	Male	Intervention	D-CH	3	0.98
1102	Male	Control	D-CH	5	0.95
1103	Male	Control	D-CH	7	0.91
1104	Male	Control	D-CH	5	1
1129	Female	Control	D-CH	3	0.98
1130	Male	Control	D-CH	6	0.91
1131	Male	Intervention	D-CH	5	0.86
1132	Male	Control	D-CH	1	1
1133	Female	Intervention	D-CH	4	0.98
1134	Male	Intervention	D-CH	5	1
1135	Female	Control	D-CH	2	0.7
1136	Male	Intervention	D-CH	5	0.58
1137	Male	Control	D-CH	4	0.93
1138	Male	Control	D-CH	4	1
1139	Male	Control	D-CH	6	0.98
1140	Male	Intervention	D-CH	4	0.65
1141	Male	Control	D-CH	3	0.88
1142	Male	Intervention	D-CH	4	0.99
1143	Female	Intervention	D-CH	3	0.97
1144	Female	Intervention	D-CH	3	0.97
1162	Male	Control	D-CH	1	0.87
1177	Female	Control	D-CH	2	0.57
1178	Male	Control	D-CH	4	0.98
1179	Female	Intervention	D-CH	6	0.96
1180	Female	Control	D-CH	2	0.34
1181	Male	Control	D-CH	3	0.92
1183	Female	Intervention	D-CH	1	0.92
1184	Female	Intervention	D-CH	5	0.86
1185	Female	Intervention	D-CH	1	0.98
1186	Female	Intervention	D-CH	3	0.97
1187	Male	Control	D-CH	2	1
1188	Female	Control	D-CH	5	0.81
1189	Female	Control	D-CH	3	0.97
1190	Male	Intervention	D-CH	1	1
1193	Female	Intervention	D-CH	2	0.89
1194	Male	Intervention	D-CH	4	0.98
1195	Female	Intervention	D-CH	3	0.94
1196	Female	Intervention	D-CH	1	1
1198	Female	Control	D-CH	5	0.99
1200	Female	Control	D-CH	4	0.94
1201	Male	Control	D-CH	2	0.82
1210	Male	Intervention	D-CH	5	1
1211	Male	Control	D-CH	6	0.93
1215	Male	Control	D-CH	3	1
1217	Male	Control	D-CH	4	0.96
1224	Female	Control	D-CH	3	0.74
1225	Male	Intervention	D-CH	2	0.99
1227	Male	Intervention	D-CH	3	0.61
1228	Female	Control	D-CH	1	0.49
1230	Female	Intervention	D-CH	2	0.95
1232	Male	Control	D-CH	6	0.98
1234	Male	Control	D-CH	4	0.98
1235	Male	Control	D-CH	3	1
1237	Male	Intervention	D-CH	5	0.94
1238	Female	Control	D-CH	3	0.92
1243	Female	Intervention	D-CH	4	0.96
1244	Male	Control	D-CH	2	1
1245	Male	Intervention	D-CH	3	0.89
1258	Male	Intervention	D-CH	5	0.96
1260	Male	Control	D-CH	2	0.83
1261	Female	Control	D-CH	7	0.79
1263	Female	Intervention	D-CH	4	0.93
1264	Male	Control	D-CH	5	0.9
1273	Male	Control	D-CH	5	0.97
1275	Male	Control	D-CH	5	0.95
1276	Male	Intervention	D-CH	4	0.49
1277	Female	Control	D-CH	2	0.6
1278	Female	Intervention	D-CH	5	0.95
1279	Male	Intervention	D-CH	7	0.91
1289	Male	Control	D-CH	2	0.82
1290	Female	Intervention	D-CH	3	0.95
1292	Male	Control	D-CH	1	1
1293	Male	Control	D-CH	7	0.97
1294	Male	Control	D-CH	3	0.74
1321	Female	Control	D-CH	3	1
1322	Male	Control	D-CH	6	0.93
1323	Female	Intervention	D-CH	4	1
1332	Female	Control	D-CH	6	0.83
1337	Male	Control	D-CH	3	0.96
1338	Male	Intervention	D-CH	5	0.99
1339	Male	Control	D-CH	4	1
1340	Female	Intervention	D-CH	1	0.92
1341	Male	Intervention	D-CH	4	0.96
1342	Female	Intervention	D-CH	3	0.98
1343	Female	Control	D-CH	2	0.86
1344	Male	Control	D-CH	2	1
1355	Female	Intervention	D-CH	4	0.97
1357	Male	Intervention	D-CH	5	0.99
2049	Female	Intervention	D-CH	3	0.97
2050	Female	Intervention	D-CH	1	0.97
2051	Male	Control	D-CH	5	0.5
2053	Female	Control	D-CH	2	0.32
2055	Female	Control	D-CH	2	0.89
2056	Male	Intervention	D-CH	5	0.93
2057	Male	Intervention	D-CH	3	0.99
2059	Female	Control	D-CH	2	0.82
2060	Female	Control	D-CH	4	1
2063	Female	Control	D-CH	4	0.88
3001	Female	Control	D-CH	3	0.64
3005	Male	Intervention	D-CH	8	0.91
3018	Female	Intervention	D-CH	5	0.74
3020	Female	Control	D-CH	5	0.86
3034	Male	Control	D-CH	9	0.88
3035	Male	Control	D-CH	2	1
3036	Female	Intervention	D-CH	4	1
3038	Male	Control	D-CH	1	0.67
3039	Female	Intervention	D-CH	3	0.92
3050	Male	Control	D-CH	1	0.79
3084	Male	Control	D-CH	5	0.56
3095	Male	Intervention	D-CH	2	0.86
3100	Female	Control	D-CH	6	0.93
3103	Female	Control	D-CH	4	0.9
3116	Female	Control	D-CH	3	1
3118	Female	Control	D-CH	2	1
3125	Male	Intervention	D-CH	3	0.87
3130	Male	Intervention	D-CH	3	0.83
3131	Male	Intervention	D-CH	6	0.87
3132	Male	Control	D-CH	4	0.84
3133	Female	Control	D-CH	4	0.96
3134	Female	Intervention	D-CH	3	0.87
3135	Female	Intervention	D-CH	5	1
3137	Female	Intervention	D-CH	8	0.86
3138	Female	Control	D-CH	4	0.97
3139	Female	Intervention	D-CH	2	0.83
3140	Female	Intervention	D-CH	1	0.94
3141	Male	Control	D-CH	2	0.94
3142	Female	Control	D-CH	5	1
3143	Male	Intervention	D-CH	6	0.98
3144	Female	Control	D-CH	1	0.99
3145	Male	Control	D-CH	10	0.95
3147	Female	Control	D-CH	3	0.57
3151	Male	Intervention	D-CH	1	1
3171	Male	Intervention	D-CH	2	0.7
3181	Male	Intervention	D-CH	5	0.98
3193	Female	Control	D-CH	2	0.91
3194	Female	Control	D-CH	4	0.99
3195	Female	Intervention	D-CH	1	0.9
3196	Female	Intervention	D-CH	4	0.85
3197	Female	Control	D-CH	3	0.94
3198	Female	Intervention	D-CH	3	0.76
3199	Male	Intervention	D-CH	6	0.84
3200	Female	Control	D-CH	1	1
3201	Female	Intervention	D-CH	7	0.88
3202	Male	Control	D-CH	6	0.99
3210	Female	Intervention	D-CH	3	0.86
3213	Male	Intervention	D-CH	1	0.87
3214	Female	Intervention	D-CH	6	0.85
3218	Female	Control	D-CH	2	0.87
3220	Female	Intervention	D-CH	2	0.84
3221	Male	Intervention	D-CH	3	0.9
3226	Female	Control	D-CH	4	0.52
3227	Female	Intervention	D-CH	2	0.65
3228	Male	Control	D-CH	5	0.58
3229	Female	Intervention	D-CH	1	1
3230	Female	Intervention	D-CH	1	0.9
3231	Female	Control	D-CH	3	0.78
3232	Female	Intervention	D-CH	2	0.11
3233	Male	Control	D-CH	4	1
3234	Female	Intervention	D-CH	2	0.97
3235	Male	Intervention	D-CH	5	0.93
3236	Female	Control	D-CH	6	0.92
5002	Male	Intervention	F-CH	4	0.74
5003	Female	Intervention	F-CH	5	0.88
5005	Male	Control	F-CH	4	0.9
5006	Female	Intervention	F-CH	2	0.76
5007	Female	Intervention	F-CH	5	0.9
5018	Male	Intervention	F-CH	4	0.91
5019	Female	Control	F-CH	4	0.84
5020	Male	Intervention	F-CH	4	0.97
5021	Male	Control	F-CH	3	0.98
5022	Female	Intervention	F-CH	2	0.9
5023	Female	Intervention	F-CH	8	0.93
5024	Female	Control	F-CH	3	0.9
5025	Male	Intervention	F-CH	4	0.92
5026	Female	Intervention	F-CH	2	0.93
5027	Female	Control	F-CH	4	0.76
5029	Male	Intervention	F-CH	3	0.66
5030	Female	Control	F-CH	2	0.99
6001	Female	Intervention	F-CH	1	0.6
6003	Female	Intervention	F-CH	1	0.78
6004	Female	Control	F-CH	2	0.56
6006	Female	Intervention	F-CH	2	0.61
6008	Male	Control	F-CH	1	0.82
6010	Male	Control	F-CH	4	0.81
6012	Female	Intervention	F-CH	2	0.75
6013	Female	Intervention	F-CH	3	0.73
6014	Male	Control	F-CH	3	0.56
6033	Female	Intervention	F-CH	3	1
6035	Male	Intervention	F-CH	1	0.96
6036	Male	Intervention	F-CH	1	0.45
6037	Male	Control	F-CH	5	0.92
6038	Female	Control	F-CH	4	0.46
6039	Male	Control	F-CH	3	0.88
6040	Male	Control	F-CH	5	0.99
6043	Male	Control	F-CH	4	0.9
6044	Female	Intervention	F-CH	4	0.89
6045	Male	Control	F-CH	4	1
6046	Female	Intervention	F-CH	2	0.91
6047	Female	Control	F-CH	3	0.8
6048	Male	Intervention	F-CH	2	0.77
6055	Female	Control	F-CH	3	0.99
6066	Female	Control	F-CH	2	0.59
6067	Female	Control	F-CH	1	0.89
6068	Female	Intervention	F-CH	2	0.63
6069	Female	Control	F-CH	6	0.79
6071	Female	Intervention	F-CH	1	0.99
6072	Male	Intervention	F-CH	1	1
6073	Female	Control	F-CH	1	0.95
6074	Female	Control	F-CH	1	1
6075	Female	Intervention	F-CH	1	1
6076	Female	Control	F-CH	1	0.87
6078	Male	Intervention	F-CH	2	0.97
6079	Female	Control	F-CH	1	1
6080	Female	Intervention	F-CH	3	0.76
6114	Male	Control	F-CH	2	0.8
6116	Male	Control	F-CH	5	0.81
6119	Female	Control	F-CH	1	0.92
7017	Male	Control	F-CH	2	0.97
7018	Female	Control	F-CH	3	0.69
7019	Male	Intervention	F-CH	4	0.86
7020	Male	Control	F-CH	3	0.81
7021	Female	Intervention	F-CH	3	0.7
7022	Female	Intervention	F-CH	2	0.88
7023	Female	Control	F-CH	5	1
7024	Male	Intervention	F-CH	4	0.86
7025	Female	Control	F-CH	6	0.94
7036	Female	Control	F-CH	1	0.91
7037	Male	Control	F-CH	4	0.79
8001	Female	Control	F-CH	3	0.67
8003	Female	Intervention	F-CH	2	0.94
8019	Male	Intervention	F-CH	3	0.62
8020	Male	Intervention	F-CH	3	0.94
8021	Female	Intervention	F-CH	1	0.98
8033	Female	Control	F-CH	4	0.5
8034	Female	Intervention	F-CH	2	0.98
8035	Male	Control	F-CH	3	0.96
8036	Female	Intervention	F-CH	7	0.9
8037	Female	Intervention	F-CH	3	0.95
8038	Female	Control	F-CH	4	0.9
8041	Female	Control	F-CH	7	0.93
8054	Male	Intervention	F-CH	3	0.92
8055	Female	Control	F-CH	1	0.6
9001	Female	Control	F-CH	3	0.69
9002	Female	Intervention	F-CH	6	0.85
9003	Female	Intervention	F-CH	3	1
9004	Female	Intervention	F-CH	5	0.97
9005	Male	Intervention	F-CH	2	0.93
9017	Female	Intervention	F-CH	4	0.92
9018	Female	Control	F-CH	3	0.99
9019	Female	Intervention	F-CH	3	0.71
9020	Female	Intervention	F-CH	2	0.98
9021	Male	Control	F-CH	4	1
9022	Male	Intervention	F-CH	4	0.74
9024	Male	Control	F-CH	4	0.86
9025	Male	Control	F-CH	7	0.93
